# Supplementary material for: Improving the electrochemical performance of the LiNi0.5Mn1.5O4spinel by polypyrrole coating as a cathode material for the lithium-ion battery
Source: Royal Society of Chemistry journal article supplement (doi:10.1039/c4ta04018j), 2014-11-04
Supplement: c4ta04018j1.pdf [file c4ta04018j1.pdf]

## Electronic Supplementary Information

### Improving the Electrochemical Performance of $\text{LiNi}_{0.5}\text{Mn}_{1.5}\text{O}_4$ Spinel by Polypyrrole Coating as Cathode Material for the Lithium-ion Battery

Xuanwen Gao<sup>a</sup>, Yuanfu Deng<sup>b</sup>, David Wexler<sup>c</sup>, Guohua Chen<sup>d</sup>, Shulei Chou<sup>a</sup>, Huakun Liu<sup>a</sup>, Zhicong Shi<sup>e</sup>, Jiazhao Wang<sup>a\*</sup>

<sup>a\*</sup> Institute for Superconducting and Electronic Materials, University of Wollongong, Wollongong, NSW 2522, Australia.

<sup>b</sup> The Key Laboratory of Fuel Cell Technology of Guangdong Province, School of Chemistry and Chemical Engineering, South China University of Technology, Guangzhou, China.

<sup>c</sup> School of Mechanical, Materials and Mechatronic Engineering, University of Wollongong, NSW 2522, Australia.

<sup>d</sup> Department of Chemical and Biomolecular Engineering, The Hong Kong University of Science and Technology, Clearwater Bay, Hong Kong, China.

<sup>e</sup> Centre for Green Products and Processing Technologies, Guangzhou HKUST Fok Ying Tung Research Institute, Guangzhou, China.

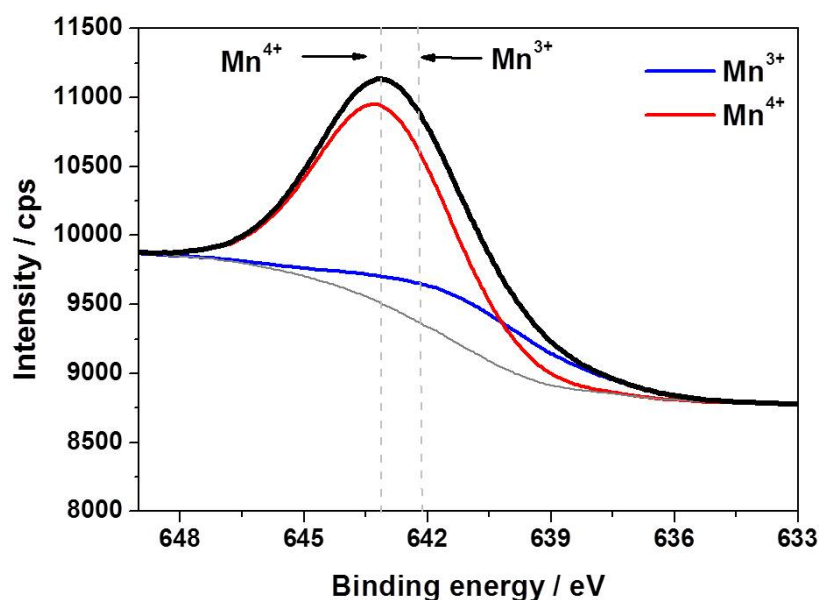

Figure S1. Mn 2p<sub>3/2</sub> XPS spectrum of the bare LNMO spinel. The major peak with binding energy of 643.5 eV corresponds to Mn<sup>4+</sup> and the other peak located at 642.1 eV belongs to Mn<sup>3+</sup>.

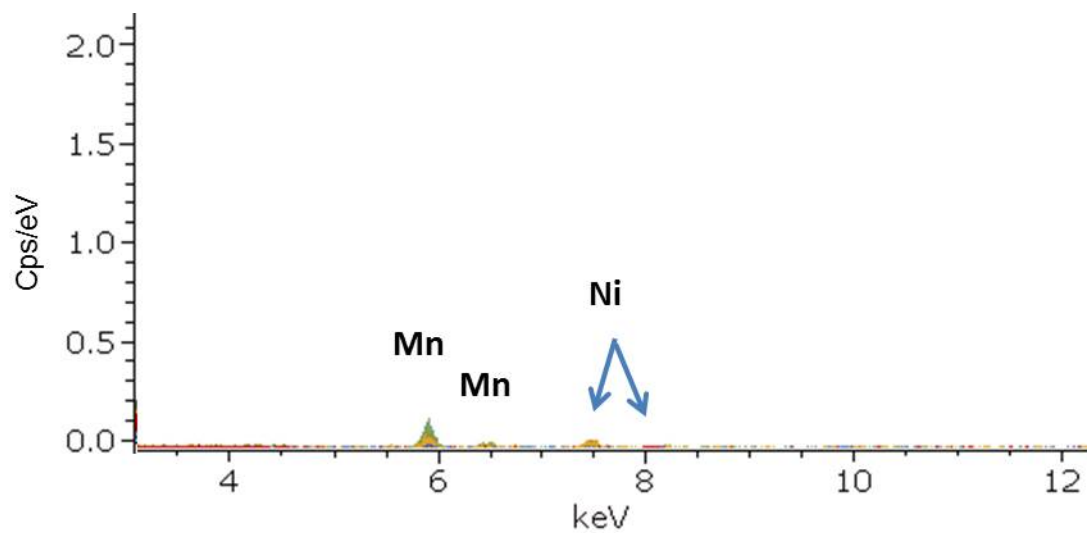

Figure S2. EDS spectrum obtained from the sample region of the lithium anode in the coin cell for the LNMO-5 wt.% PPy sample after 100 cycles at 55 °C.
